# Supplementary material for: Enzymatic functionalization of decellularized tilapia skin scaffolds with enhanced skin regeneration
Source: Royal Society of Chemistry journal article supplement (doi:10.1039/d3sm01742g), 2024-01-01
Supplement: d3sm01742g1.pdf [file d3sm01742g1.pdf]

*Supporting information*

## **Enzymatic functionalization of decellularized tilapia skin scaffolds with enhanced skin regeneration**

Cuixia Chen<sup>1\*</sup>, Wenwen Tao<sup>1</sup>, Di Jiang<sup>1</sup>, Yanyan Yang<sup>2</sup>, Tiantian Liang<sup>1</sup>, Qilong Gu<sup>1</sup>, Yuran Xu<sup>1</sup>,  
Junjuan Zhao<sup>1</sup>, Xing Zhou<sup>3</sup>, Xinglong Fan<sup>4</sup>

1. State Key Laboratory of Heavy Oil Processing and Center for Bioengineering and Biotechnology,  
China University of Petroleum (East China), 66 Changjiang West Road, Qingdao 266580, China

2. Shandong Marine Resource and Environment Research Institute, 216 Changjiang Road, Yantai  
Economic Development Zone, Yantai 264006, China

3. Qingdao West Coast New Area Marine Development Bureau, Qingdao 266400, China

4. Department of Thoracic Surgery, Qilu Hospital (Qingdao), Cheeloo College of Medicine,  
Shandong University, Qingdao 266035, China

Correspondence author: Cuixia Chen, [chenCX@upc.edu.cn](mailto:chenCX@upc.edu.cn)

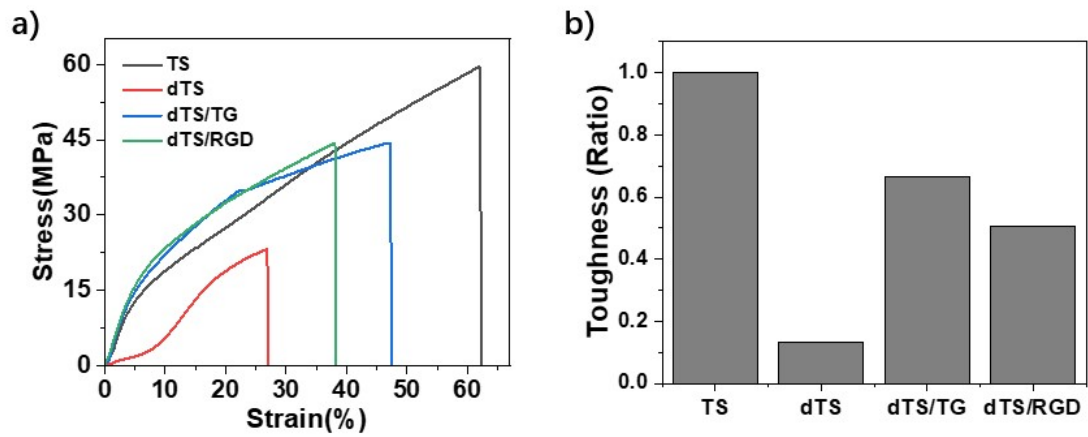

Figure S1. a) Stress-strain curve of TS and all dTS scaffolds; b) The ratio of toughness of TS, dTS, dTS/TG, and dTS/RGD, respectively.

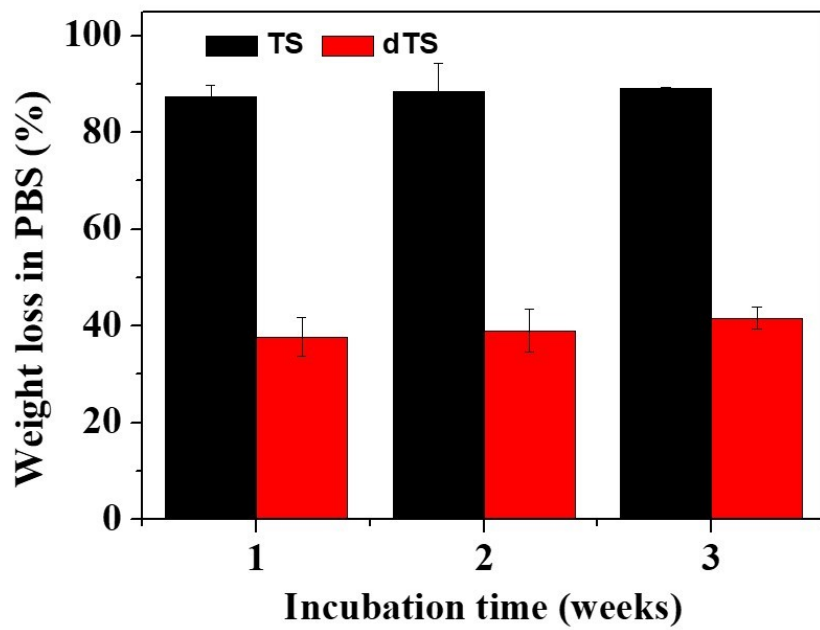

Figure S2. Degradation of TS and dTS with incubation time. All scaffolds were immersed in PBS for different time intervals.

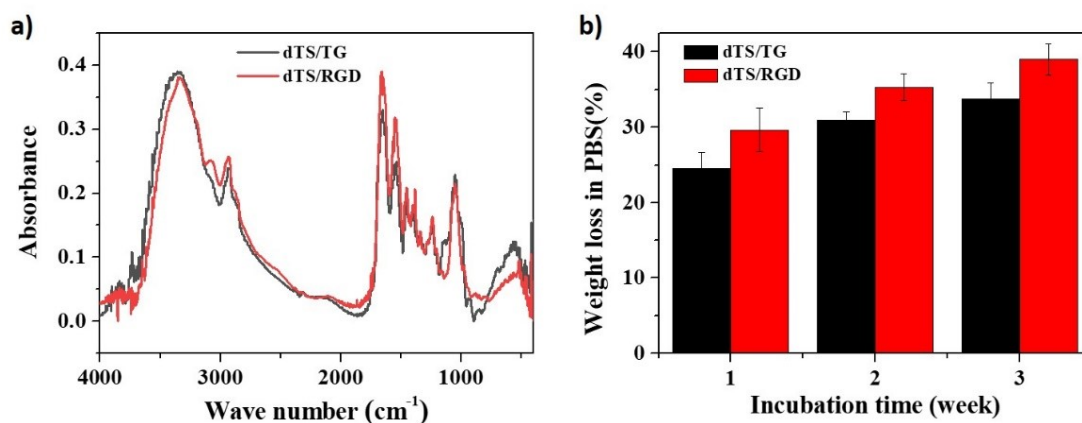

Figure S3. (a) FTIR spectra of dTS/TG and dTS/RGD, and (b) the degradation activity of dTS/TG and dTS /RGD scaffolds.

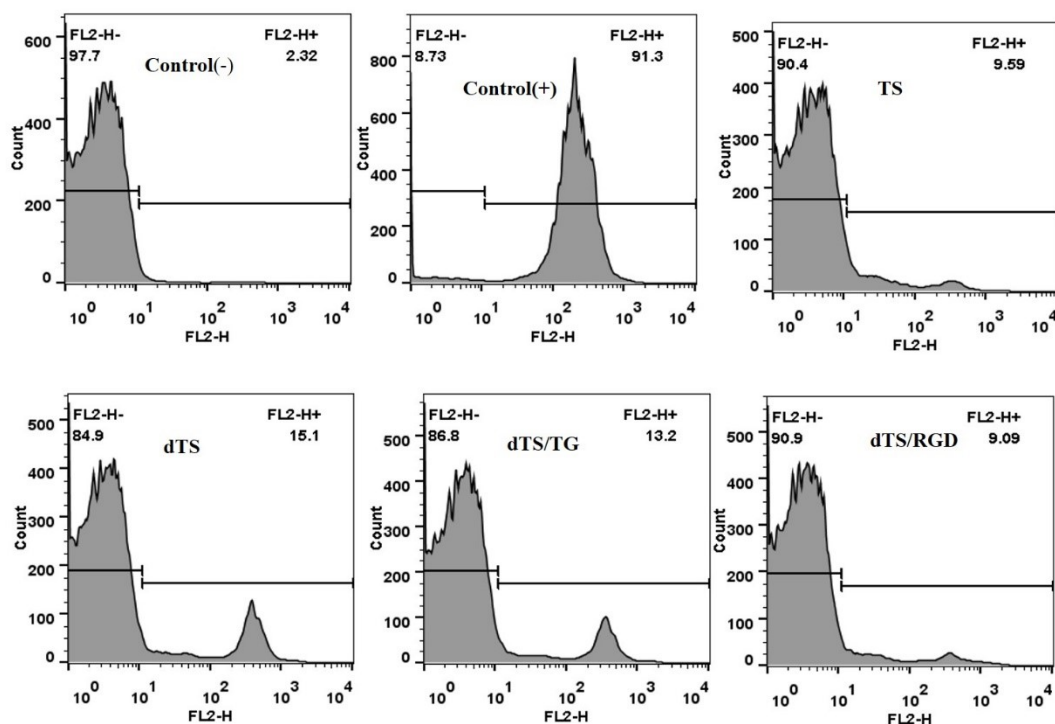

Figure S4. Antibacterial activity of TS, dTS, dTS/TG, and dTS/RGD against *E. coli*.

Table S1 the porosity of the dTS/TG scaffolds

| Sample   | Porosity |
|----------|----------|
| 0.1 U/mL | 61.58%   |
| 0.5 U/mL | 59.22%   |
| 1 U/mL   | 57.74%   |
| 2 U/mL   | 57.86%   |

Table S2 the characters of dTS/TG and dTS/RGD

| Sample  | Porosity | Maximum<br>tensile (MPa) | Elongation at<br>break (%) |
|---------|----------|--------------------------|----------------------------|
| dTS/TG  | 57.74%   | 46.64±2.34               | 47.81±12.15                |
| dTS/RGD | 56.22%   | 46.36±8.30               | 41.68±0.66                 |
